# Supplementary material
Source: PubMed Central journal article supplement (PMC2754767)

**Supporting Information for**

**NMR Spectroscopy and Molecular Modelling Studies of Nitrosylcobalamin:  
Further Evidence that the Deprotonated, Base-off Form is Important for  
Nitrosylcobalamin in Solution**

Hanaa A. Hassanin, Luciana Hannibal, Donald W. Jacobsen, Kenneth L. Brown, Helder M. Marques, Nicola E. Brasch

**Table S1.** Correlation Table for NMR Connectivities for NOCbl Observed by Total Correlation Spectroscopy (TOCSY), Rotating Frame NOE (ROESY), and Heteronuclear Multiple-Bond Correlation (HMBC) Spectroscopy<sup>a</sup>

| Resonance | TOCSY                  | ROESY                                                        | HMBC               |
|-----------|------------------------|--------------------------------------------------------------|--------------------|
| C53       |                        | C13, C54, C56'                                               | C14, C15, C16      |
| C35       |                        | C3, C36, cH <sub>A</sub>                                     | C4, C5, C6         |
| C25       |                        | C18, C19, C20, C26'', aH <sub>A</sub> , aH <sub>S</sub> , B4 | C1, C2, C3, C26    |
| C54       |                        | C18, C53, C55'', gH <sub>A</sub> , gH <sub>S</sub>           | C16, C17, C18, C55 |
| Pr3       | Pr1', Pr1'', Pr2       | Pr1', Pr1'', Pr2, C55'', fH                                  | Pr1, Pr2           |
| C36       |                        | C8, C35, B10, cH <sub>S</sub> , cH <sub>A</sub>              | C6, C7, C8, C37    |
| C47       |                        | C10, C13, C46, C48'', C49', C49''                            | C11, C12, C13, C46 |
| B10       | B7                     | C36, B4                                                      |                    |
| B11       | B4                     | B7      B5                                                   |                    |
| C20       |                        | C18, C19, C25, C30', B4, B7                                  | C1, C2, C19        |
| C30'      | C3, C31''              | C3, C35    C3                                                |                    |
| C30''     | C3                     | C31'      C31                                                |                    |
| C41'      | C8, C41'', C42''       | C8, C10, C41'', C42'', dH <sub>A</sub>                       | C8, C42            |
| C41''     | C8, C41', C42''        | C8, C10, C41'                                                |                    |
| C48'      | C13, C48'', C49''      | C10, C13, C47, C48'', C49'                                   | C12, C13, C50      |
| C48''     | C13, C48', C49', C49'' | C10, C13, C47, C48'', C49'                                   | C12, C13, C14, C50 |
| C46       |                        | C10, C13, C47                                                | C11, C12, C13, C47 |
| C55'      | C55''                  | C18, C55'', fH                                               | C16, C57           |
| C55''     | C55'                   | C18, C54, C55', fH                                           | C16, C17, C56, C57 |
| C42'      | C8, C42''              | C8, C42'', dH <sub>A</sub>                                   | C8, C41, C43       |
| C42''     | C8, C41', C41'', C42'  | C41', C42'                                                   |                    |

Supplementary Material (ESI) for Dalton Transactions  
 This journal is © The Royal Society of Chemistry 2009

|       |                          |                                                                                                                              |                                |
|-------|--------------------------|------------------------------------------------------------------------------------------------------------------------------|--------------------------------|
| C31'  | C3                       | C3, C20, C25, C26', C36, <i>aH<sub>A</sub></i>                                                                               | C3, C30, C32                   |
| C31'' | C3, C30', C30''          | C3, C26'', C36, <i>bH<sub>A</sub></i> , <i>bH<sub>S</sub></i>                                                                | C3, C30, C32                   |
| C56'  | C56''                    | C54, C55'', <i>fH</i>                                                                                                        | C17, C55, C56                  |
| C56'' | C56'                     | C53, R4, <i>fH</i>                                                                                                           | C565, C57                      |
| C49'  | C13, C48'', C49''        | C47, C49'', <i>eH<sub>S</sub></i> , <i>eH<sub>A</sub></i>                                                                    | C13, C48, C50                  |
| C49'' | C13, C48', C48'', C49'   | C47, C49', C53, <i>eH<sub>A</sub></i> , <i>eH<sub>S</sub></i>                                                                | C13, C48, C50                  |
| C60'  | C19                      | C55', <i>gH<sub>A</sub></i> , <i>gH<sub>S</sub></i>                                                                          |                                |
| C60'' | C19                      | C55', <i>gH<sub>A</sub></i> , <i>gH<sub>S</sub></i>                                                                          |                                |
| C18   | C19                      | C19, C20, C25, C55', C55'', Pr3, <i>gH<sub>A</sub></i> , <i>gH<sub>S</sub></i>                                               | C1, C17, C19, C54, C55         |
| C26'  |                          | <i>aH<sub>A</sub></i> , <i>aH<sub>S</sub></i> C1, C2, C3, C25, C27                                                           |                                |
| C26'' |                          | C25, C31', <i>aH<sub>A</sub></i>                                                                                             | C1, C2, C3, C25, C27           |
| C37'  | C37''                    | C8, C36, C37'', B10, <i>cH<sub>A</sub></i> , <i>cH<sub>S</sub></i>                                                           | C7, C8, C36, C38               |
| C37'' | C37'                     | C8, C36, C37'                                                                                                                | C6, C7, C8, C36                |
| Pr1'  | Pr1'', Pr2, Pr3          | Pr1'', Pr2, Pr3, <i>fH</i>                                                                                                   | C57, Pr3                       |
| Pr1'' | Pr1', Pr2, Pr3           | Pr1', Pr2, Pr3, <i>fH</i>                                                                                                    | Pr2, C57                       |
| C13   | C48', C48'', C49', C49'' | C46, C47, C48', C48'', C49', C49'', C53                                                                                      | C11, C12, C14, C15, C46, C48   |
| C8    | C41', C41'', C42', C42'' | C10, C36, C37'', C41', C42', <i>cH<sub>A</sub></i> , <i>cH<sub>S</sub></i> , <i>dH<sub>A</sub></i>                           | C6, C7, C9, C10, C37, C41, C42 |
| C3    | C30', C30'', C31', C31'' | C26'', C30', C31', C31'', C35, <i>aH<sub>A</sub></i> , <i>aH<sub>S</sub></i> , <i>bH<sub>A</sub></i> , <i>bH<sub>S</sub></i> | C1, C2, C4, C26, C30, C31      |
| R5'   | R2, R4, R5''             | R3, R4, R5''                                                                                                                 |                                |
| R5''  | R2, R3, R4, R5'          | R3, R4, R5'                                                                                                                  | R3                             |
| R2    | R1, R4, R5', R5''        | R1, R5'', B7                                                                                                                 | R1, R4                         |
| Pr2   | Pr1', Pr1'', Pr3         | Pr1', Pr1'', Pr3, <i>fH</i>                                                                                                  | Pr1                            |
| R3    | R1, R2, R4, R5', R5''    | R1, R5', R5''                                                                                                                |                                |
| C19   | C18, C60', C60''         | C18, C25, B10, Pr3                                                                                                           | C1, C2, C18, C60               |
| R4    | R2, R3, R5', R5''        | C30'', R1, R5', R5'', B7                                                                                                     |                                |
| R1    | R2, R3                   | R2, R3, R4, B7                                                                                                               |                                |

|                         |                         |                                                     |                  |
|-------------------------|-------------------------|-----------------------------------------------------|------------------|
| C10                     |                         | C8, C41', C41'', C46, C47, C48''                    | C8, C9, C11, C12 |
| B7                      | B4, B11                 | R1, R2, R4, B7, B11                                 | B8, B9, B11      |
| B4                      | B7, B10                 | C25, C35, B10                                       | B8, B9           |
| B2                      |                         | C30', C30'', R1, R4                                 | B8, B9           |
| <i>d</i> H <sub>S</sub> | <i>d</i> H <sub>A</sub> | <i>d</i> H <sub>A</sub>                             |                  |
| <i>c</i> H <sub>S</sub> | <i>c</i> H <sub>A</sub> | C8, C35, C36, C37', <i>c</i> H <sub>A</sub>         |                  |
| <i>d</i> H <sub>A</sub> | <i>d</i> H <sub>S</sub> | C8, C41', <i>d</i> H <sub>S</sub>                   |                  |
| <i>e</i> H <sub>S</sub> | <i>e</i> H <sub>A</sub> | C49', C49'', C53, <i>e</i> H <sub>A</sub>           | C50              |
| <i>b</i> H <sub>S</sub> | <i>b</i> H <sub>A</sub> | C3, C3'', <i>b</i> H <sub>A</sub>                   |                  |
| <i>a</i> H <sub>S</sub> | <i>a</i> H <sub>A</sub> | C3, C25, C26', <i>a</i> H <sub>A</sub>              |                  |
| <i>g</i> H <sub>S</sub> | <i>g</i> H <sub>A</sub> | C18, C54, C60'', <i>g</i> H <sub>A</sub>            |                  |
| <i>e</i> H <sub>A</sub> | <i>e</i> H <sub>S</sub> | C49', C49'', C53, <i>e</i> H <sub>S</sub>           |                  |
| <i>c</i> H <sub>A</sub> | <i>c</i> H <sub>S</sub> | C8, C35, C36, C37', <i>c</i> H <sub>S</sub>         |                  |
| <i>b</i> H <sub>A</sub> | <i>b</i> H <sub>S</sub> | C3, C31'', <i>b</i> H <sub>S</sub>                  |                  |
| <i>a</i> H <sub>A</sub> | <i>a</i> H <sub>S</sub> | C3, C25, C26', C26'', C31', <i>a</i> H <sub>S</sub> |                  |
| <i>g</i> H <sub>A</sub> | <i>g</i> H <sub>S</sub> | C18, C54, C60, <i>g</i> H <sub>S</sub>              |                  |
| <i>f</i> H              | Pr1', Pr1''             | C55', C56', C56'', Pr1', Pr1'', Pr2, Pr3            |                  |

<sup>a</sup> In 0.15 M phosphate buffer, 90% H<sub>2</sub>O/10% D<sub>2</sub>O, using pulsed field gradient solvent suppression. Chemical shifts are relative to internal TSP. Prime and double prime denote the downfield and upfield members, respectively, of pairs of diastereotopic methylene protons. The *syn* and *anti* amide H's are designated *a*H<sub>S</sub>, *a*H<sub>A</sub>, *b*H<sub>S</sub>, *b*H<sub>A</sub>, etc., respectively, where *a*, *b*, etc., refer to the standard side chain lettering.

**Table S2.** Observed nOe's, their assigned strength, and the average, standard deviation, maximum, minimum and median H–H distances during a 500 ps molecular dynamics simulation at 300 K of the base-on and base-off forms of NOCbl with sampling every 10 fs. The nOe's that violate the distance criteria in both base-on and base-off forms are highlighted in blue; those that show a violation only in the base-on form are highlighted in yellow, whilst those that show a violation in only the base-off form are highlighted in orange. Violations are further indicated in *bold italicized text*.

| nOe        | Strength | Base-on       |                |              |              |              | Base-off      |                |               |              |              |
|------------|----------|---------------|----------------|--------------|--------------|--------------|---------------|----------------|---------------|--------------|--------------|
|            |          | average<br>/Å | $\sigma$<br>/Å | max<br>/Å    | min<br>/Å    | median<br>/Å | average<br>/Å | $\sigma$<br>/Å | max<br>/Å     | min<br>/Å    | median<br>/Å |
| C46, C13   | M        | 2.594         | 0.134          | 3.252        | 1.927        | 2.591        | 2.588         | 0.170          | 3.351         | 2.018        | 2.582        |
| C25, C3    | M        | 3.010         | 0.116          | 3.537        | 2.475        | 3.010        | 3.020         | 0.154          | 3.701         | 2.473        | 3.019        |
| C41", C8   | M        | 3.093         | 0.047          | 3.336        | 2.853        | 3.093        | 3.092         | 0.062          | 3.369         | 2.668        | 3.092        |
| C25, C18   | S        | 2.973         | 0.198          | 3.764        | 2.113        | 2.977        | 2.919         | 0.234          | 3.862         | 2.155        | 2.906        |
| C25, C31"  | S        | 2.942         | 0.637          | 4.210        | 1.848        | 2.616        | 2.562         | 0.291          | 4.300         | 1.882        | 2.523        |
| C25, C26'  | M        | 2.687         | 0.135          | 3.662        | 2.084        | 2.680        | 2.680         | 0.178          | 3.430         | 2.089        | 2.678        |
| C41", B10  | M        | 3.467         | 0.250          | 4.631        | 2.287        | 3.470        | 3.005         | 0.490          | 6.069         | 1.792        | 2.945        |
| C25, C30'  | M        | 2.361         | 0.178          | 3.673        | 1.794        | 2.337        | 2.338         | 0.214          | 3.607         | 1.782        | 2.309        |
| C47, C13   | M        | 3.097         | 0.143          | 3.828        | 2.491        | 3.083        | 3.045         | 0.161          | 4.007         | 2.340        | 3.040        |
| C47, C49'  | M        | 2.301         | 0.149          | 3.234        | 1.707        | 2.287        | 2.376         | 0.211          | 4.043         | 1.739        | 2.352        |
| C47, C49"  | M        | 2.432         | 0.504          | 4.537        | 1.738        | 2.260        | 2.697         | 0.605          | 5.568         | 1.782        | 2.471        |
| Pr3, Pr2   | S        | 2.514         | 0.083          | 2.938        | 2.124        | 2.511        | 2.646         | 0.263          | 3.282         | 2.091        | 2.552        |
| C47, C42'  | M        | 3.207         | 0.310          | 4.625        | 2.069        | 3.201        | 2.733         | 0.378          | 5.721         | 1.819        | 2.684        |
| C36, C8    | M        | 3.008         | 0.112          | 3.610        | 2.455        | 3.009        | 3.050         | 0.165          | 4.114         | 2.370        | 3.044        |
| C36, C41'  | M        | 2.368         | 0.147          | 3.158        | 1.844        | 2.357        | 2.315         | 0.176          | 3.618         | 1.797        | 2.298        |
| C36, C35   | M        | 3.600         | 0.107          | 4.246        | 1.862        | 3.595        | 2.566         | 0.569          | 5.422         | 1.756        | 2.343        |
| C36, C37'  | S        | 2.440         | 0.165          | 3.979        | 1.889        | 2.423        | 2.378         | 0.180          | 3.815         | 1.912        | 2.361        |
| C42', C41' | M        | 2.584         | 0.084          | 3.002        | 2.155        | 2.584        | 2.617         | 0.124          | 3.247         | 2.069        | 2.610        |
| C36, B10   | S        | 2.473         | 0.189          | 3.553        | 1.791        | 2.461        | 2.772         | 0.345          | 5.657         | 1.861        | 2.741        |
| C36, C41"  | M        | 2.443         | 0.159          | 3.427        | 1.822        | 2.434        | 2.476         | 0.233          | 4.331         | 1.786        | 2.451        |
| C56", R4   | W        | <b>4.531</b>  | <b>0.562</b>   | <b>6.938</b> | <b>2.420</b> | <b>4.413</b> | <b>5.923</b>  | <b>0.732</b>   | <b>10.675</b> | <b>4.030</b> | <b>5.883</b> |
| C37", C8   | M        | 2.760         | 0.146          | 3.703        | 2.042        | 2.754        | 2.928         | 0.190          | 4.330         | 2.147        | 2.923        |
| Pr3, Pr1'  | M        | 2.589         | 0.135          | 3.453        | 2.042        | 2.585        | 2.847         | 0.510          | 4.121         | 1.993        | 2.635        |
| C48", C13  | M        | 3.089         | 0.051          | 3.393        | 2.814        | 3.089        | 3.086         | 0.089          | 3.363         | 2.182        | 3.093        |
| C30', C3   | M        | 2.672         | 0.085          | 3.150        | 2.218        | 2.673        | 2.733         | 0.118          | 3.149         | 2.260        | 2.736        |
| C30', C35  | S        | 2.643         | 0.236          | 3.989        | 1.902        | 2.634        | 2.886         | 0.354          | 5.791         | 1.909        | 2.857        |
| C42', C8   | S        | 2.648         | 0.136          | 3.377        | 2.061        | 2.641        | 2.607         | 0.167          | 3.627         | 2.033        | 2.602        |

| nOe         | Strength | Base-on       |                |              |              |              | Base-off      |                |              |              |              |
|-------------|----------|---------------|----------------|--------------|--------------|--------------|---------------|----------------|--------------|--------------|--------------|
|             |          | average<br>/Å | $\sigma$<br>/Å | max<br>/Å    | min<br>/Å    | median<br>/Å | average<br>/Å | $\sigma$<br>/Å | max<br>/Å    | min<br>/Å    | median<br>/Å |
| C41', C42'' | M        | 3.099         | 0.047          | 3.353        | 2.880        | 3.099        | 3.076         | 0.093          | 3.345        | 2.277        | 3.084        |
| C26', C3    | S        | 2.550         | 0.132          | 3.133        | 1.983        | 2.547        | 2.555         | 0.172          | 3.198        | 1.854        | 2.551        |
| C3, C26''   | S        | <b>3.527</b>  | <b>0.065</b>   | <b>3.889</b> | <b>3.248</b> | <b>3.526</b> | <b>3.528</b>  | <b>0.082</b>   | <b>3.870</b> | <b>3.148</b> | <b>3.526</b> |
| C37', C8    | M        | 3.585         | 0.088          | 3.973        | 2.532        | 3.584        | 3.534         | 0.105          | 3.905        | 2.941        | 3.535        |
| C53, C13    | S        | 2.424         | 0.260          | 3.826        | 1.781        | 2.374        | 2.405         | 0.301          | 3.745        | 1.773        | 2.352        |
| C56', C18   | S        | <b>3.363</b>  | <b>0.167</b>   | <b>3.973</b> | <b>2.520</b> | <b>3.382</b> | <b>2.562</b>  | <b>0.199</b>   | <b>3.876</b> | <b>1.921</b> | <b>2.551</b> |
| Pr3, Pr1''  | M        | 2.683         | 0.208          | 4.063        | 2.173        | 2.651        | 2.781         | 0.272          | 3.993        | 2.095        | 2.733        |
| C53, C18    | W        | <b>5.081</b>  | <b>0.432</b>   | <b>6.637</b> | <b>4.400</b> | <b>4.927</b> | <b>5.243</b>  | <b>0.426</b>   | <b>6.465</b> | <b>4.306</b> | <b>5.112</b> |
| C35, C3     | S        | 2.855         | 0.208          | 3.681        | 1.876        | 2.862        | 2.342         | 0.308          | 3.879        | 1.742        | 2.253        |
| C31', C3    | S        | 2.600         | 0.207          | 3.712        | 1.933        | 2.583        | 2.491         | 0.162          | 3.230        | 1.966        | 2.484        |
| C18, C19    | M        | 3.012         | 0.052          | 3.273        | 2.729        | 3.013        | 3.028         | 0.066          | 3.286        | 2.709        | 3.029        |
| Pr1'', Pr2  | M        | 3.087         | 0.070          | 3.327        | 2.376        | 3.094        | 3.090         | 0.066          | 3.386        | 2.415        | 3.092        |
| Pr1', Pr2   | M        | 2.563         | 0.128          | 3.312        | 2.190        | 2.545        | 2.545         | 0.116          | 3.225        | 2.097        | 2.542        |
| R5'', R3    | M        | 3.081         | 0.208          | 3.707        | 2.176        | 3.107        | 2.605         | 0.228          | 4.143        | 1.958        | 2.581        |
| R5', R3     | W        | 3.811         | 0.087          | 4.192        | 2.456        | 3.814        | 3.005         | 0.230          | 4.217        | 2.119        | 3.012        |
| R5'', R4    | M        | 2.532         | 0.088          | 3.003        | 2.180        | 2.526        | 3.092         | 0.102          | 3.368        | 2.102        | 3.102        |
| R5', R4     | M        | 2.498         | 0.083          | 2.888        | 2.077        | 2.500        | 2.573         | 0.132          | 3.263        | 2.116        | 2.564        |
| R4, R3      | W        | 3.096         | 0.052          | 3.353        | 2.645        | 3.097        | 3.083         | 0.063          | 3.361        | 2.771        | 3.082        |
| R1, R2      | S        | 2.448         | 0.073          | 5.886        | 2.127        | 2.448        | 2.458         | 0.090          | 2.828        | 2.114        | 2.457        |
| C10, C8     | S        | 2.528         | 0.078          | 3.735        | 2.134        | 2.527        | 2.574         | 0.101          | 2.990        | 2.186        | 2.573        |
| C10, C42'   | S        | 2.644         | 0.194          | 3.801        | 2.002        | 2.632        | 2.594         | 0.262          | 4.676        | 1.901        | 2.566        |
| C10, C47    | S        | 2.823         | 0.184          | 3.676        | 2.031        | 2.833        | 2.748         | 0.203          | 3.632        | 2.000        | 2.743        |
| B7, R1      | S        | 2.569         | 0.173          | 6.834        | 2.024        | 2.573        | 2.616         | 0.216          | 3.761        | 1.875        | 2.603        |
| R1, R3      | S        | 2.887         | 0.149          | 3.681        | 2.323        | 2.872        | 2.738         | 0.173          | 3.524        | 2.121        | 2.732        |
| B7, R2      | M        | 2.869         | 0.346          | 4.534        | 2.043        | 2.801        | 2.791         | 0.368          | 4.453        | 1.735        | 2.743        |
| B7, R4      | VW       | <b>5.670</b>  | <b>0.209</b>   | <b>6.413</b> | <b>2.321</b> | <b>5.652</b> | <b>5.686</b>  | <b>0.253</b>   | <b>6.411</b> | <b>4.415</b> | <b>5.715</b> |
| C54, C19    | M        | 3.039         | 0.363          | 4.474        | 2.061        | 2.982        | 2.872         | 0.333          | 4.521        | 1.911        | 2.830        |
| B2, R1      | W        | 3.790         | 0.100          | 4.171        | 3.317        | 3.788        | 3.802         | 0.126          | 4.231        | 3.041        | 3.811        |
| B2, R4      | M        | 2.972         | 0.323          | 4.186        | 1.922        | 2.980        | 3.178         | 0.351          | 4.965        | 2.098        | 3.165        |
| fH, R3      | W        | <b>5.086</b>  | <b>0.381</b>   | <b>6.774</b> | <b>3.539</b> | <b>5.078</b> | <b>3.040</b>  | <b>0.587</b>   | <b>6.981</b> | <b>1.775</b> | <b>2.986</b> |
| fH, Pr2     | M        | 2.781         | 0.166          | 3.513        | 2.032        | 2.788        | 2.971         | 0.393          | 4.091        | 2.017        | 2.860        |
| fH, R4      | W        | 3.554         | 0.488          | 6.573        | 2.059        | 3.518        | 5.743         | 0.524          | 8.413        | 3.370        | 5.738        |

| nOe        | Strength | Base-on |          |       |       |        | Base-off |          |       |       |        |
|------------|----------|---------|----------|-------|-------|--------|----------|----------|-------|-------|--------|
|            |          | average | $\sigma$ | max   | min   | median | average  | $\sigma$ | max   | min   | median |
|            |          | /Å      | /Å       | /Å    | /Å    | /Å     | /Å       | /Å       | /Å    | /Å    | /Å     |
| fH, Pr1'   | M        | 2.549   | 0.126    | 3.253 | 2.178 | 2.533  | 2.799    | 0.231    | 3.275 | 2.194 | 2.773  |
| fH, Pr1''  | M        | 3.052   | 0.078    | 3.303 | 2.337 | 3.062  | 2.819    | 0.288    | 3.280 | 2.132 | 2.982  |
| C54, C18   | M        | 3.543   | 0.159    | 4.102 | 2.711 | 3.562  | 3.663    | 0.150    | 4.575 | 2.626 | 3.668  |
| C54, C60'' | M        | 2.464   | 0.167    | 3.493 | 1.854 | 2.453  | 2.448    | 0.278    | 4.187 | 1.824 | 2.406  |
| C54, C53   | S        | 2.392   | 0.233    | 3.715 | 1.705 | 2.390  | 2.454    | 0.442    | 4.113 | 1.691 | 2.297  |

**Table S3.** Comparison of the solid state structure\* and the molecular modelling consensus structure of base-on NOCbl.

| Bond Lengths /Å         |                |              |              |                  |
|-------------------------|----------------|--------------|--------------|------------------|
| (a) Coordination sphere |                |              |              |                  |
|                         |                | Consensus    | Solid State  | Cons-Solid state |
| Co                      | N21            | 1.880        | 1.857        | 0.023            |
| Co                      | N24            | 1.894        | 1.888        | 0.006            |
|                         | <i>Average</i> | <b>1.887</b> | <b>1.873</b> |                  |
| Co                      | N22            | 1.921        | 1.909        | 0.012            |
| Co                      | N23            | 1.929        | 1.915        | 0.014            |
|                         | <i>Average</i> | <b>1.925</b> | <b>1.912</b> |                  |
| Co                      | NB3            | 2.063        | 2.123        | 0.060            |
| Co                      | N(O)           | 1.925        | 1.928        | 0.003            |
| N(O)                    | O              | 1.175        | 1.183        | 0.008            |
|                         |                |              | 1.143        | 0.032            |
|                         |                |              | 1.201        | 0.026            |
|                         | <i>Average</i> |              | <b>1.176</b> |                  |
| (b) C–N                 |                |              |              |                  |
| C1                      | N21            | 1.482        | 1.496        | 0.014            |
| C19                     | N24            | 1.447        | 1.473        | 0.026            |
|                         | <i>Average</i> | <b>1.465</b> | <b>1.485</b> |                  |
| C4                      | N21            | 1.303        | 1.291        | 0.012            |
| C16                     | N24            | 1.302        | 1.309        | 0.007            |
|                         | <i>Average</i> | <b>1.303</b> | <b>1.300</b> |                  |
| C6                      | N22            | 1.378        | 1.394        | 0.016            |
| C9                      | N22            | 1.361        | 1.338        | 0.023            |
| C11                     | N23            | 1.370        | 1.345        | 0.025            |
| C14                     | N23            | 1.373        | 1.380        | 0.007            |
|                         | <i>Average</i> | <b>1.371</b> | <b>1.364</b> |                  |
| (c) Corrin double bonds |                |              |              |                  |
| C4                      | C5             | 1.405        | 1.442        | 0.037            |
| C5                      | C6             | 1.405        | 1.368        | 0.037            |
| C9                      | C10            | 1.391        | 1.394        | 0.003            |
| C10                     | C11            | 1.392        | 1.350        | 0.042            |



|                |     |              |              |       |
|----------------|-----|--------------|--------------|-------|
| C14            | C15 | 1.406        | 1.326        | 0.080 |
| C15            | C16 | 1.409        | 1.467        | 0.058 |
| <i>Average</i> |     | <b>1.402</b> | <b>1.391</b> |       |

(d) Corrin single bonds

|                |     |              |              |       |
|----------------|-----|--------------|--------------|-------|
| C1             | C2  | 1.570        | 1.582        | 0.012 |
| C2             | C3  | 1.543        | 1.573        | 0.030 |
| C3             | C4  | 1.512        | 1.527        | 0.015 |
| C6             | C7  | 1.526        | 1.549        | 0.023 |
| C7             | C8  | 1.548        | 1.573        | 0.025 |
| C8             | C9  | 1.498        | 1.512        | 0.014 |
| C11            | C12 | 1.508        | 1.546        | 0.038 |
| C12            | C13 | 1.538        | 1.543        | 0.005 |
| C13            | C14 | 1.518        | 1.562        | 0.044 |
| C16            | C17 | 1.529        | 1.531        | 0.002 |
| C17            | C18 | 1.563        | 1.571        | 0.008 |
| C18            | C19 | 1.537        | 1.572        | 0.035 |
| C19            | C1  | 1.536        | 1.506        | 0.030 |
| <i>Average</i> |     | <b>1.533</b> | <b>1.550</b> |       |

Bond Angles /deg

|     |     |      | Consensus | Solid State | Cons-Solid state |
|-----|-----|------|-----------|-------------|------------------|
| N21 | Co  | N24  | 84.2      | 83.4        | 0.8              |
| N21 | Co  | N22  | 90.7      | 90.0        | 0.7              |
| N21 | C4  | C3   | 109.9     | 112.1       | 2.2              |
| N21 | C1  | C2   | 98.5      | 102.8       | 4.3              |
| N21 | Co  | N(O) | 90.9      | 92.2        | 1.3              |
| N21 | Co  | N3B  | 92.9      | 90.1        | 2.8              |
| N22 | Co  | N23  | 94.9      | 96.6        | 1.7              |
| N22 | C6  | C7   | 108.8     | 107.9       | 0.9              |
| N22 | C9  | C10  | 126.8     | 125.8       | 1.0              |
| N22 | Co  | N(O) | 87.2      | 87.2        | 0.0              |
| N22 | Co  | N3B  | 87.1      | 87.2        | 0.1              |
| N23 | Co  | N24  | 90.2      | 90.3        | 0.1              |
| N23 | C11 | C12  | 110.3     | 110.0       | 0.3              |
| N23 | C14 | C15  | 126.0     | 129.1       | 3.1              |
| N23 | Co  | N(O) | 89.2      | 91.3        | 2.1              |
| N23 | Co  | N3B  | 87.3      | 87.2        | 0.1              |
| N24 | C16 | C17  | 110.4     | 112.0       | 1.6              |
| N24 | C19 | C18  | 106.6     | 103.4       | 3.2              |
| N24 | Co  | N(O) | 90.0      | 89.0        | 1.0              |

|     |     |     |       |       |     |
|-----|-----|-----|-------|-------|-----|
| N24 | Co  | N3B | 94.6  | 96.9  | 2.3 |
| Co  | N21 | C1  | 114.9 | 117.1 | 2.2 |
| Co  | N23 | C11 | 124.8 | 122.1 | 2.7 |
| Co  | N24 | C16 | 133.9 | 133.1 | 0.8 |
| C1  | C19 | N24 | 106.6 | 107.9 | 1.3 |
| C1  | C2  | C3  | 103.9 | 101.4 | 2.5 |
| C2  | C3  | C4  | 98.7  | 101.2 | 2.5 |
| C4  | C5  | C6  | 122.9 | 120.8 | 2.1 |
| C4  | N21 | C1  | 114.8 | 112.5 | 2.3 |
| C4  | N21 | Co  | 129.4 | 130.1 | 0.7 |
| C5  | C4  | N21 | 124.6 | 125.2 | 0.6 |
| C5  | C6  | N22 | 123.1 | 122.8 | 0.3 |
| C6  | N22 | Co  | 126.6 | 127.5 | 0.9 |
| C6  | N22 | C9  | 108.7 | 110.1 | 1.4 |
| C6  | C7  | C8  | 102.0 | 101.0 | 1.0 |
| C7  | C8  | C9  | 99.1  | 99.1  | 0.0 |
| C8  | C9  | N22 | 108.9 | 112.2 | 3.3 |
| C9  | N22 | Co  | 123.7 | 122.3 | 1.4 |
| C9  | C10 | C11 | 123.2 | 124.8 | 1.6 |
| C10 | C11 | N23 | 125.5 | 127.1 | 1.6 |
| C11 | N23 | C14 | 109.6 | 112.6 | 3.0 |
| C11 | C12 | C13 | 99.0  | 101.2 | 2.2 |
| C12 | C13 | C14 | 101.9 | 102.3 | 0.4 |
| C13 | C14 | N23 | 107.8 | 107.4 | 0.4 |
| C14 | C15 | C53 | 115.3 | 120.8 | 5.5 |
| C14 | N23 | Co  | 125.6 | 125.3 | 0.3 |
| C15 | C16 | N24 | 121.3 | 121.3 | 0.0 |
| C16 | C15 | C53 | 122.0 | 118.3 | 3.7 |
| C16 | C15 | C14 | 122.8 | 120.8 | 2.0 |
| C16 | N24 | C19 | 113.0 | 111.8 | 1.2 |
| C16 | C17 | C18 | 104.3 | 101.5 | 2.8 |
| C17 | C18 | C19 | 103.2 | 101.4 | 1.8 |
| C19 | N24 | Co  | 112.0 | 114.6 | 2.6 |
| C19 | C1  | N21 | 103.0 | 103.7 | 0.7 |
| C35 | C5  | C4  | 117.4 | 117.4 | 0.0 |
| C35 | C5  | C6  | 120.4 | 121.8 | 1.4 |

---

\*Hannibal, L.; Smith, C. A.; Jacobsen, D. W.; Brasch, N. E. *Angew. Chem. Int. Ed. Engl.* **2007**, *46*, 5140-5143.

**Figure S1.** Distance between (A) Co and NB3 and (B) between C20 and NB3 during a 250 ps dynamics simulation at 300 K of the base-off form of NOCbl. Co...NB3 distances of between 3 and 4 Å are indicative of the base-off species in which DMB is perpendicular to the corrin (Figure 6D) and distances of around 7 Å are indicative of the base-off species with DMB parallel to the corrin (Figure 6C).

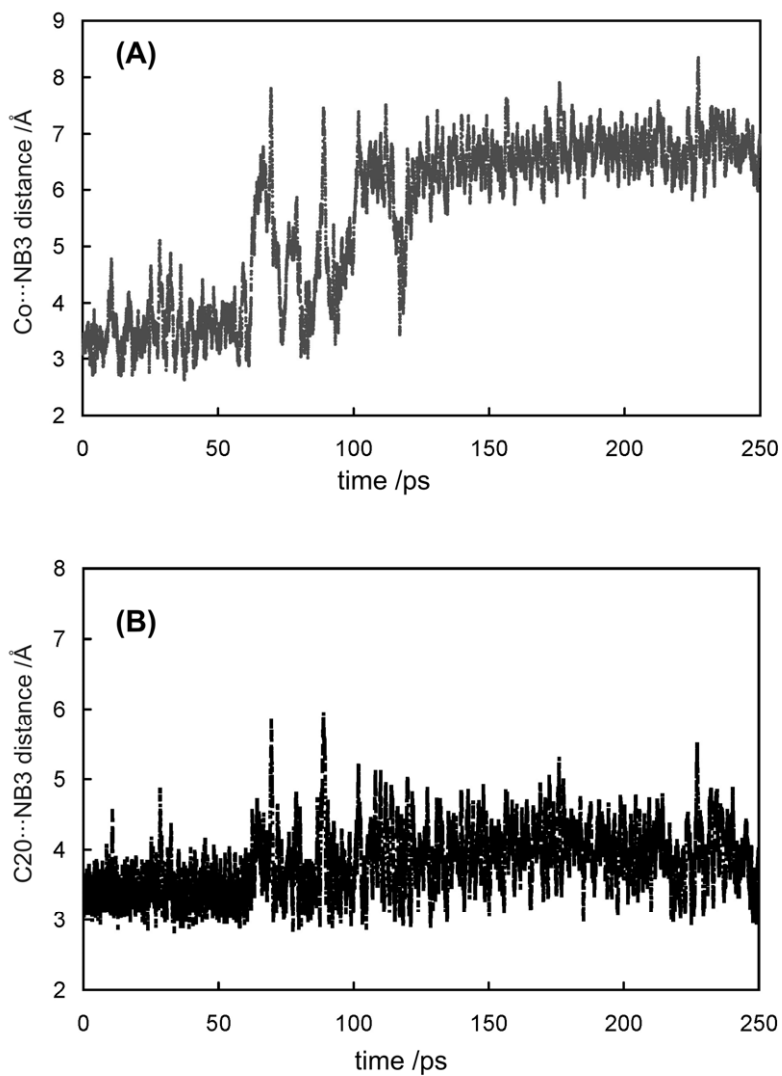

Supplement: NIHMS140810-supplement-Supplementary_Data.pdf [file NIHMS140810-supplement-Supplementary_Data.pdf]
